# Supplementary material
Source: publisher site journal article supplement (https://www.spandidos-publications.com/1550/downloadSupplementary)

Figure S1. Establishment of primary cultured myofibroblasts. (A) Explant culture of fibrous cells derived from the patient with idiopathic pulmonary fibrosis. Magnification, x100. When the dish reached confluence at 14 DIV, outgrown cells were harvested as cells at passage 0. (B) Immunofluorescence assays of the cells at passage five to elucidate the expression levels of markers for myofibroblasts. Magnification, x1,000 (top), x1,000 (middle), and x400 (bottom). Co-localization of phalloidin-labeled actin filaments and  $\alpha$ -SMA-LI was observed in the cells. Intracellular accumulation of ED-A-FN-LI was also observed in the cells. Although most of the cells were  $\alpha$ -SMA-positive, S100A4-LI (a marker of fibroblasts) was faintly detected in the cells. DIV, days *in vitro*; LI, like immunoreactivity

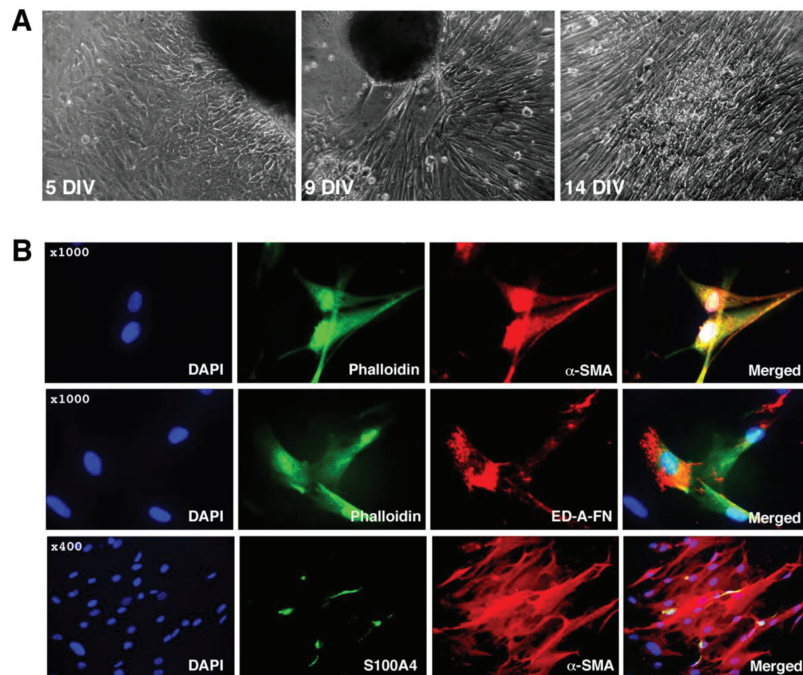

Figure S2. Enrichment analysis of differentially expressed miRNAs following JQ-1 treatment. (A) Venn diagram illustrating the overlap of identified differentially expressed miRNAs between JQ-1 and NC in the present study with the differentially expressed miRNAs between IPF and control groups identified in a previous study by Mullenbrock *et al* (30). (B) KEGG pathway analysis of overlapping six upregulated miRNAs and three downregulated miRNAs in (A), and the negative  $\log_{10}$  of the P-value. IPF, idiopathic pulmonary fibrosis; KEGG, Kyoto Encyclopedia of Genes and Genomes; miRNA/miR, microRNA; NC, normal control..

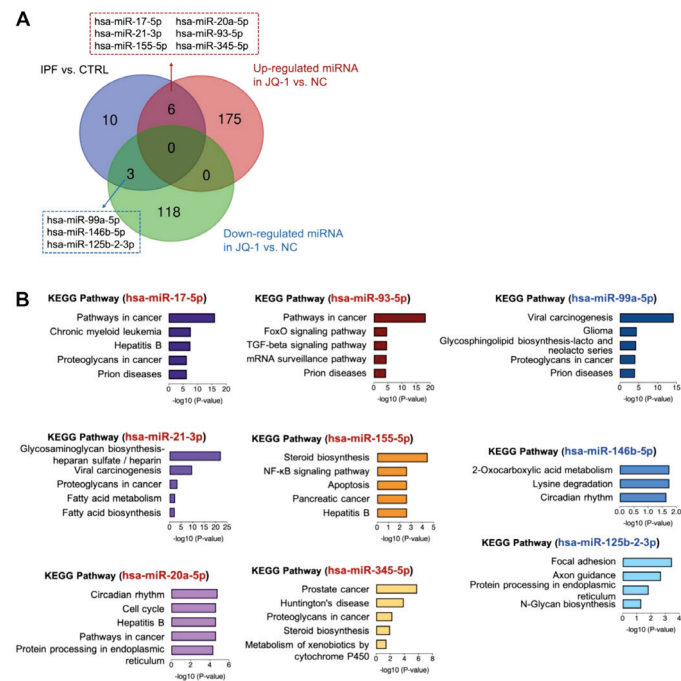

Supplement: Supplementary file 1 [file downloadSupplementary]
